# Supplementary material
Source: Springer Nature journal article supplement (https://www.springermedizin.de/resource/supplementary/12913_2008_896_MOESM3_ESM.pdf/9536398)

# Rates per 1000 person-years

0 5 10 15 20 25 30

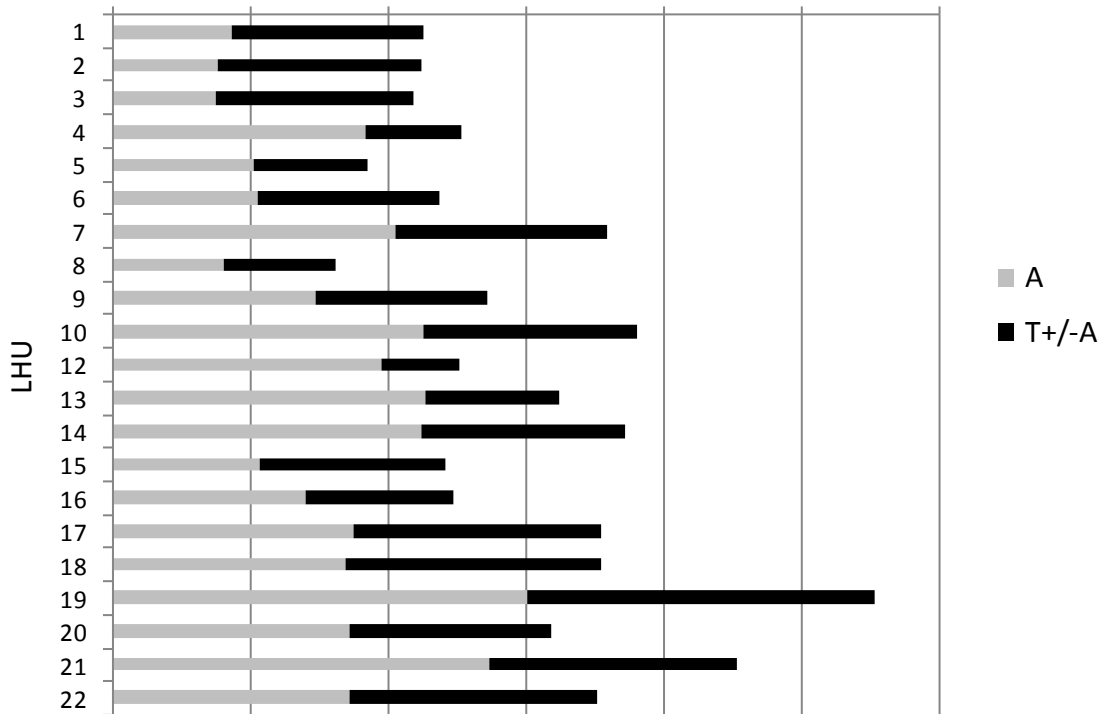

Supplement: MOESM3 [file 9536398]
